# Supplementary material for: Reduction on specific lattice planes for metal–organic frameworks/poly-pyrrole composites with dilated porosity
Source: Royal Society of Chemistry journal article supplement (doi:10.1039/d4ta00766b), 2024-01-01
Supplement: d4ta00766b1.pdf [file d4ta00766b1.pdf]

## **Reduction on Specific Lattice Planes for Metal-organic Frameworks/Poly-pyrrole Composites with Dilated Porosity**

Wenxiu He <sup>a</sup>, Xu Zhai <sup>a</sup>, Zhipeng Qiao <sup>b</sup>, Huan Chen <sup>d</sup>, Weiliang Tian <sup>c</sup>, Yu Fu <sup>a, \*</sup>, Junyi Chen <sup>c, \*</sup>

<sup>a</sup> Department of Chemistry, College of Sciences, Northeastern University, Shenyang 110819, P. R. China.

<sup>b</sup> Liaoshen Industries Co., Ltd, Shenyang 110045, P. R. China.

<sup>c</sup> Engineering Laboratory of Chemical Resources Utilization in South Xinjiang, College of Chemistry and Chemical Engineering, Tarim University, Xinjiang Uygur Autonomous Region, Alaer, 843300, P. R. China

<sup>d</sup> College of Chemistry and Chemical Engineering, Huanggang Normal University, Huanggang, 438000, P. R. China.

### **Corresponding Author**

\* E-mail: fuyu@mail.neu.edu.cn (Yu Fu)

\* E-mail: sln5xn@163.com (Junyi Chen)

## 1. Experimental section

### 1.1 Materials

All chemicals in this work were analytical grade and used without further purification. copper nitrate [Cu(NO<sub>3</sub>)<sub>2</sub>], benzenetricarboxylic acid (H<sub>3</sub>BTC), pyrrole (Py), styrene, and tert-butyl hydroperoxide (TBHP) were purchased from Energy Chemical (Shanghai). Dichloromethane (CH<sub>2</sub>Cl<sub>2</sub>), acetonitrile (CH<sub>3</sub>CN), N, N-Dimethylformamide (DMF), EtOH, and MeOH were purchased from Sinopharm Chemical Reagent Co. Ltd. Water used in this work was deionized water.

### 1.2 Characterization

The morphology of as-synthesized samples was examined by a field-emission scanning electron microscope (FE-SEM, Hitachi SU8010) and corresponding elemental mapping images were obtained by energy-dispersive X-ray (EDX, Oxford Instruments). Transmission electron microscopes (TEM, FEI TALOS F200X) were applied to get more structural information of as-synthesized samples. The crystalline structure information of as-synthesized samples was determined by Powder X-ray diffraction (XRD, Shimadzu XRD-6000) with Cu K $\alpha$  radiation source ( $k = 1.54056 \text{ \AA}$ ) at room temperature. The elemental analyses were collected by X-ray photoelectron spectroscopy (XPS, Thermo Scientific ESCALAB 250). The organic groups of the as-synthesized samples were characterized by Fourier transform infrared spectroscopy (FT-IR, Bruker VERTEX 70). TGA profiles were obtained by thermogravimetric analyzer (TGA5500) from 30 to 600 °C with a heating rate of 10 °C min<sup>-1</sup> in air flow. The content of N elements of sample is analyzed by organic element analyzer (EA, Elementar Unicube).

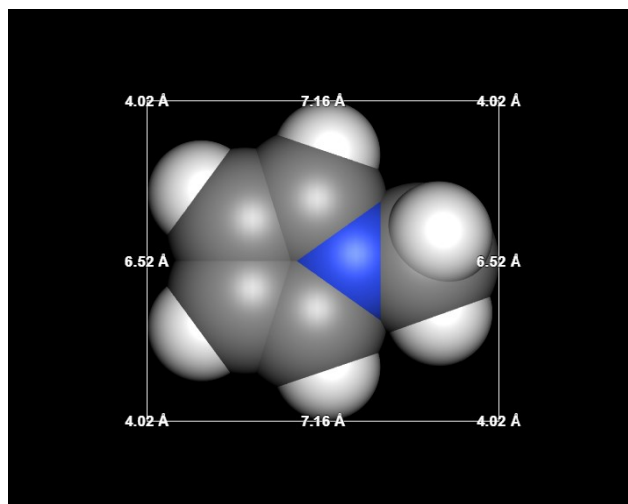

Fig. S1 Molecular size of pyrrole.

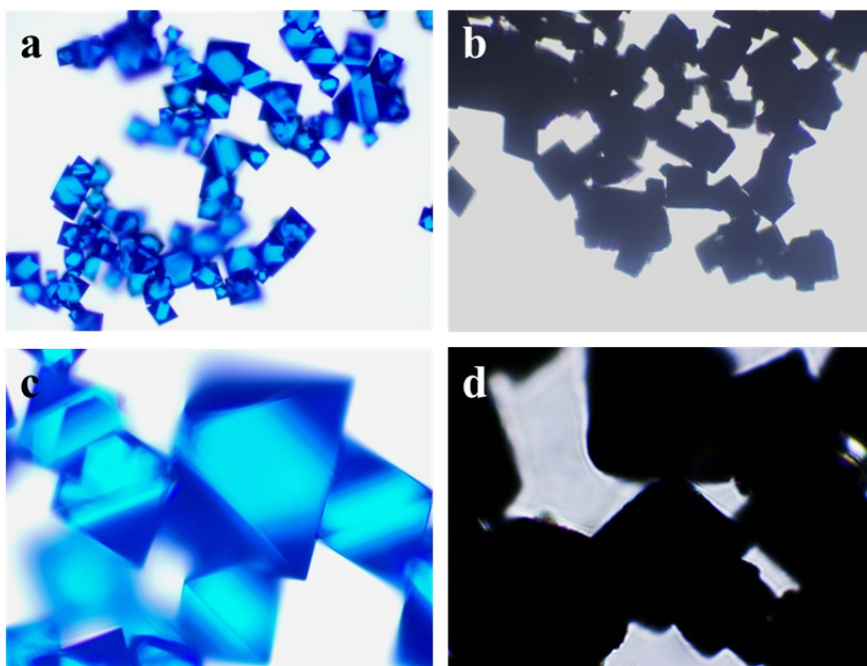

Fig. S2 Optical microscope images of Cu-BTC (a, c) and Cu-BTC/PPy (b, d).

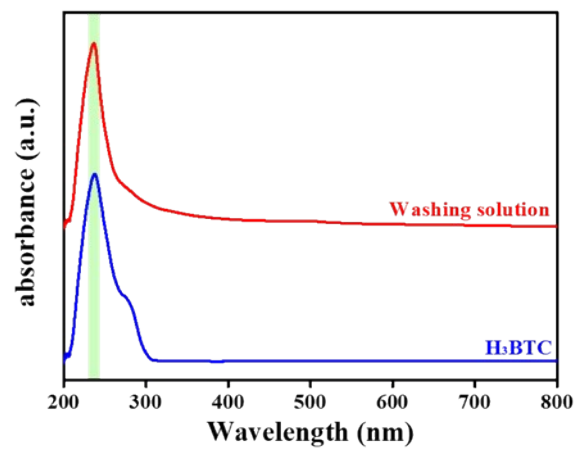

Fig. S3 The UV-vis spectrum of pure H<sub>3</sub>BTC and washing solution of Cu-BTC/PPy.

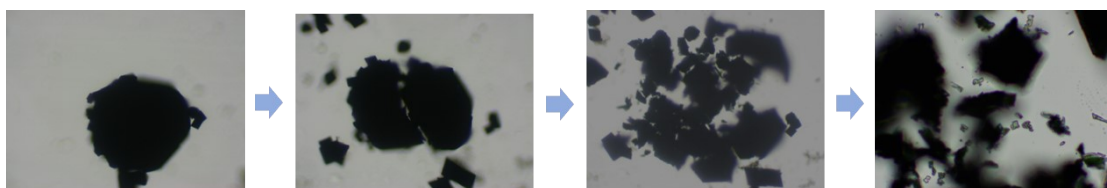

Fig. S4 Optical images of collapsed Cu-BTC/PPy.

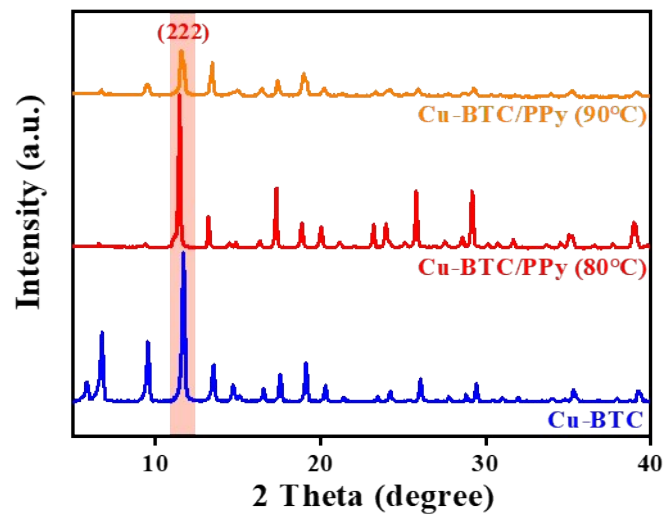

Fig. S5 The XRD pattern of Cu-BTC, Cu-BTC/PPy (80 °C), and Cu-BTC/PPy (90 °C).

**Cu-BTC/PPy (60°C)**

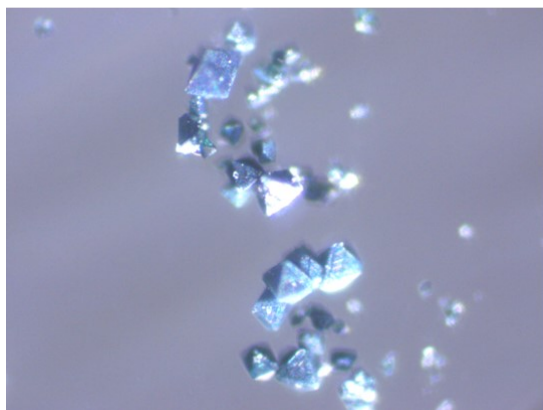

**Cu-BTC/PPy (80°C)**

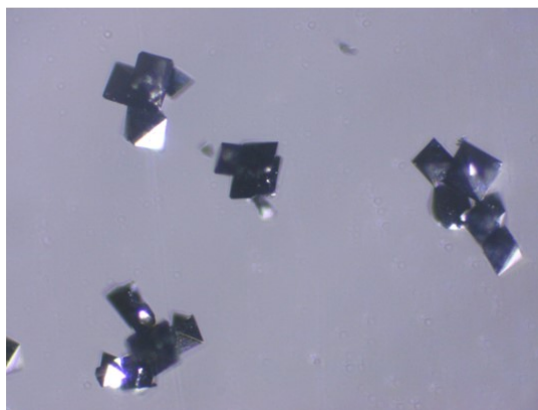

Fig. S6 The optical microscope images of Cu-BTC/PPy (60°C) and Cu-BTC/PPy (80°C).



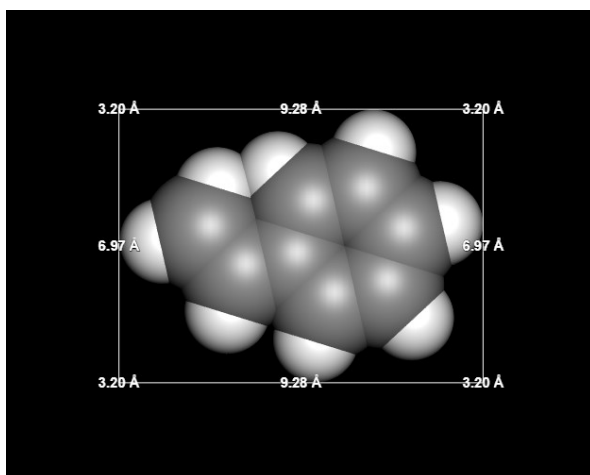

Fig. S7 Molecular size of styrene.

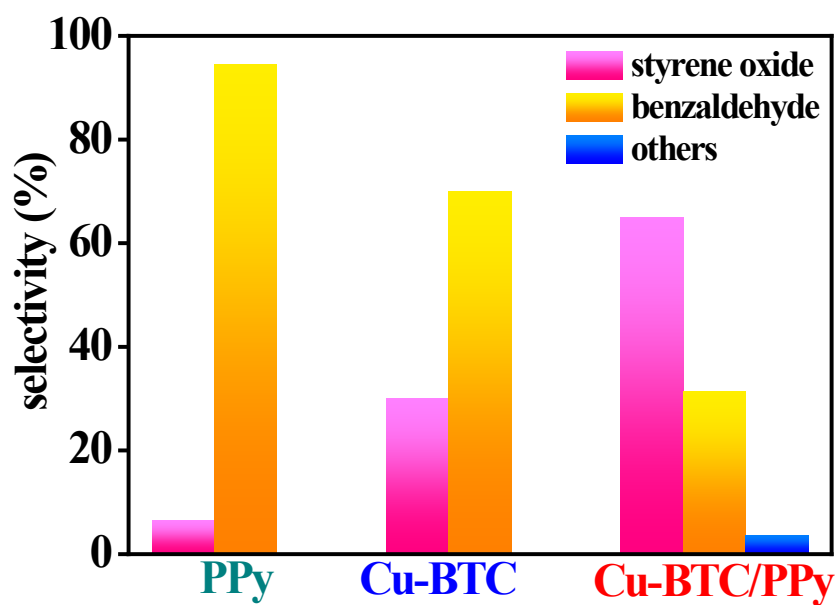

Fig. S8 The selectivity of three catalysts on styrene oxidation in oil bath.

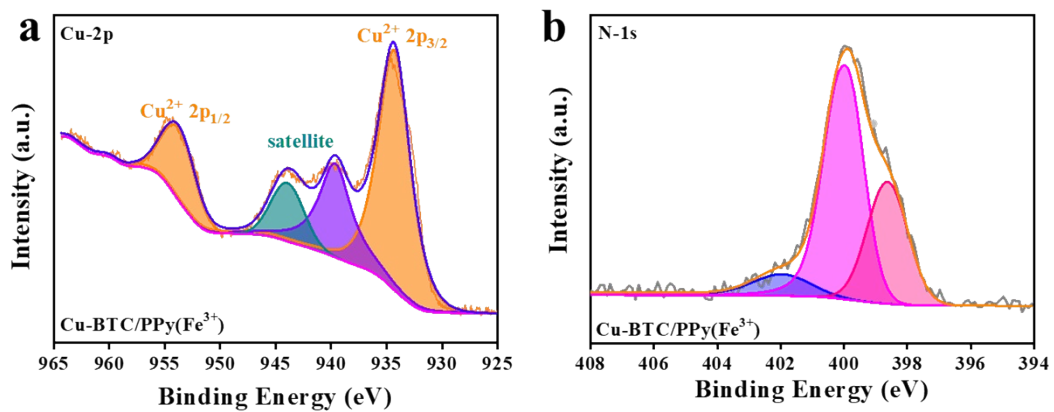

Fig. S9 The XPS spectra for Cu 2p (a) and N 1s (b) of Cu-BTC/PPy(Fe<sup>3+</sup>).

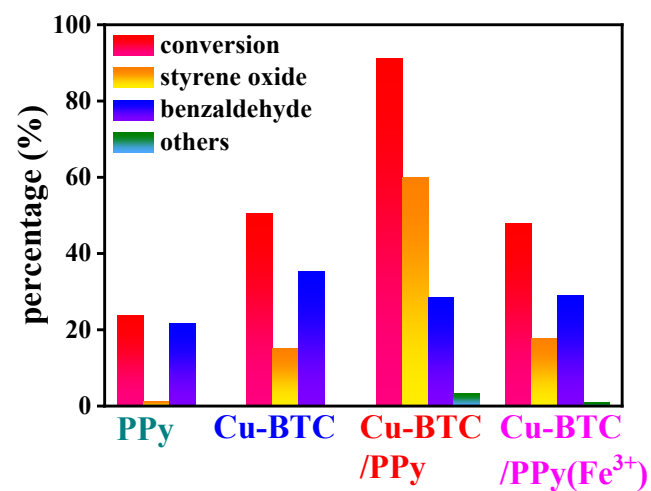

Fig. S10 The conversion and yield of PPy, Cu-BTC, Cu-BTC/PPy, and Cu-BTC/PPy(Fe<sup>3+</sup>) on styrene oxidation in oil bath.

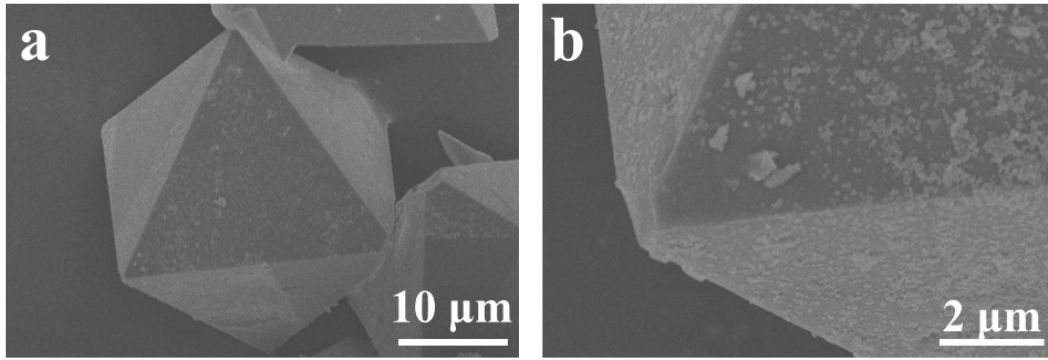

Fig. S11 SEM images of Cu-BTC/PPy after 4 cycles in oil bath.

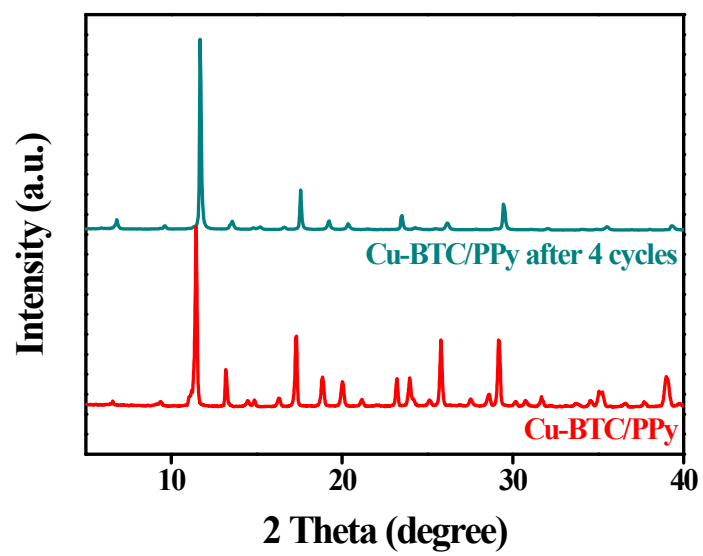

Fig. S12 XRD pattern of Cu-BTC/PPy after 4 cycles in oil bath.

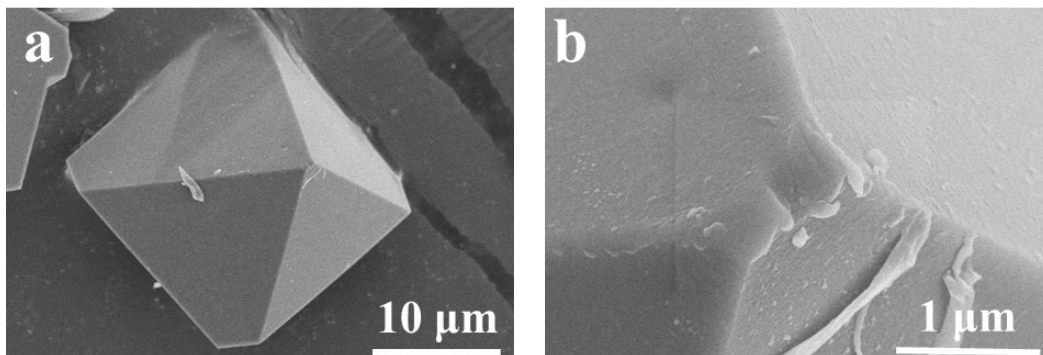

Fig. S13 SEM images of Cu-BTC/PPy after 4 cycles under Xe lamp.

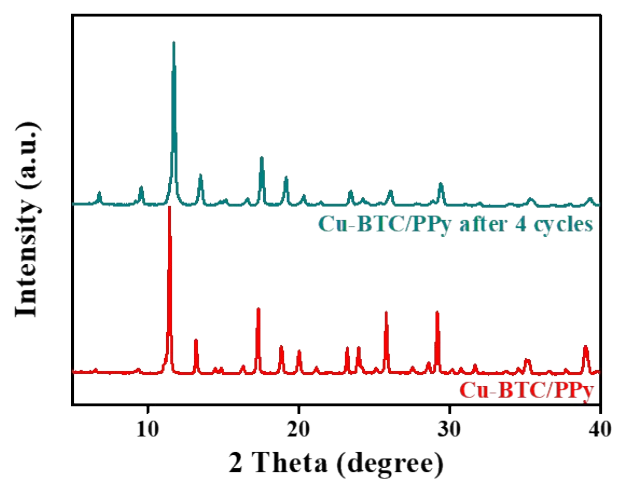

Fig. S14 XRD pattern of Cu-BTC/PPy after 4 cycles under Xe lamp.
